# Supplementary material for: Influence of Stress Sensitivity on Water-Gas Flow in Carbonate Rocks
Source: Hindawi journal article supplement (doi:10.1155/2020/6642008), 2020-12-05
Supplement: f1 [file 6642008.f1.docx]

**Supporting Information for “Influence of stress sensitivity on water-gas flow in carbonate rocks”**

Shuaishi Fu 1,2,3, Lianjin Zhang 4 , Yingwen Li 1,2 , Xuemei Lan 4 , Roohollah Askari5, Junjie Wang 4 , Wen Wen 4 , Xinze Li 1,2 , Shaobin Cai 1,2 , Ke Wang 1,2 , Jie Liu 1,2 , Yushu Wang 1,2 and Yongfei Yang1,2,*

1 Key Laboratory of Unconventional Oil & Gas Development (China University of Petroleum (East China)), Ministry of Education, Qingdao 266580, China; [fushuaishi@upc.edu.cn](mailto:fushuaishi@upc.edu.cn) (S.F.); [1047971053@qq.com](mailto:1047971053@qq.com) (Y.L.); [s18020138@s.upc.edu.cn](mailto:s18020138@s.upc.edu.cn) (X.L); [s19020157@s.upc.edu.cn](mailto:s19020157@s.upc.edu.cn) (S.C.); s18020136@s.upc.edu.cn (K.W.); [s18020122@s.upc.edu.cn](mailto:s18020122@s.upc.edu.cn) (J.L.); [z18020084@s.upc.edu.cn](mailto:z18020084@s.upc.edu.cn) (Y.W.)

2 Research Center of Multiphase Flow in Porous Media, School of Petroleum Engineering, China University of Petroleum (East China), Qingdao, 266580, China

3 School of Energy resources, China University of Geosciences (Beijing), Beijing 100083, China

4 Exploration and Development Research Institute of PetroChina Southwest Oil & Gas Field Company, Chengdu 610041, Sichuan, China; [zhanglianjin268@petrochina.com.cn](mailto:zhanglianjin268@petrochina.com.cn) (L.Z.); [lanxuemei@petrochina.com.cn](mailto:lanxuemei@petrochina.com.cn) (X.L); wangjunjie.kyy@petrochina.com.cn (J.W); [wenwen01@petrochina.com.cn](mailto:wenwen01@petrochina.com.cn) (W.W)

5 Department of Geological and Mining Engineering and Sciences, Michigan Technological University, Houghton, Michigan, USA; [raskari@mtu.edu](mailto:raskari@mtu.edu) (R.A)

*Correspondence: yangyongfei@upc.edu.cn

**Lattice Boltzmann mathematical model**

In the Lattice Boltzmann model, two steps are involved in the calculation which are the particle migration step and the particle collision step. In the particle migration step, particles move from a certain point to its near point at constant speed, which process is controlled by certain rule. In the particle collision step, particles collapse with its near particle, momentum and mass will be transferred between the two particles, thus resulting in the velocity change in both particles, and after the collision, the particles continue its migration to next particle. During the whole calculation loops of LBM, the two step repeat until calculation loops reaches convergence.

In the LBM, to each node, the relationship between the macro parameters and the particle distribution function is clear as long as the discrete velocity is certain. Assumed that  is the particle distribution function of node *x* at time *t* in the direction of *i*, according to the mass conservation and momentum conservation, the fluid density and the velocity is defined as Equation and Equation :

The commonly used boundary conditions in LBM include the bounce-back (BB) method, equilibrium scheme (ES), non-equilibrium extrapolation method (NEEM), non-equilibrium bounce-back method etc. Among them, the bounce-back method is the most commonly used method, since its great advantage in dealing with complex structure.

In LBM, we often use DnQb model to perform simulation works, which n represents dimension number and b represents the number of discrete velocity direction. In this study, a D2Q9 model is chosen to work on two-dimensional flow simulation (as shown in **Figure S1**). In DnQb model, the equilibrium distribution function is expressed at uniform style (Equation ):


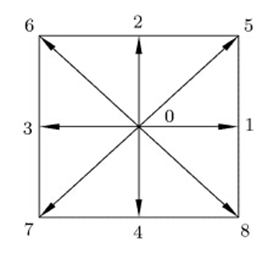


**Figure S1.** The illustration of D2Q9 model in LBM.

**Two-phase pore network simulation**

For the pores and throats with circular cross section, the Young-Laplace equation could be simplified as Equation :

where *θ*gwr is the receding gas-water contact angle; *r* is the radius of cross-section of pores and throats.

For the pores and throats with cross-sectional shape of triangle and square, the spatial distributions of gas and water phase are complex because wetting phase may reside in the corners. To calculate the capillary pressure of triangular and square throats, the Mayer, Stowe and Princen (MS-P) method is used (Blunt 2001; Blunt et al. 2002):

where, *F*d is dimensionless correction factor and described as follows:

where, *G* is shape factor; *R* is the radius of curvature; *n* is the number of corners (3 for triangle, 4 for square); *βi* is the half angle of corner *i* (as shown in **Figure S2**).

The shape factor, *G*, is defined as Equation :

where, *A* is cross-sectional area; *P* is the perimeter of the cross section.

For the triangular and square throats, after water is invaded, gas phase occupies the center region, and there exists some residual water in the corner. The effective area occupied by gas and water could be calculated as Equation and Equation :


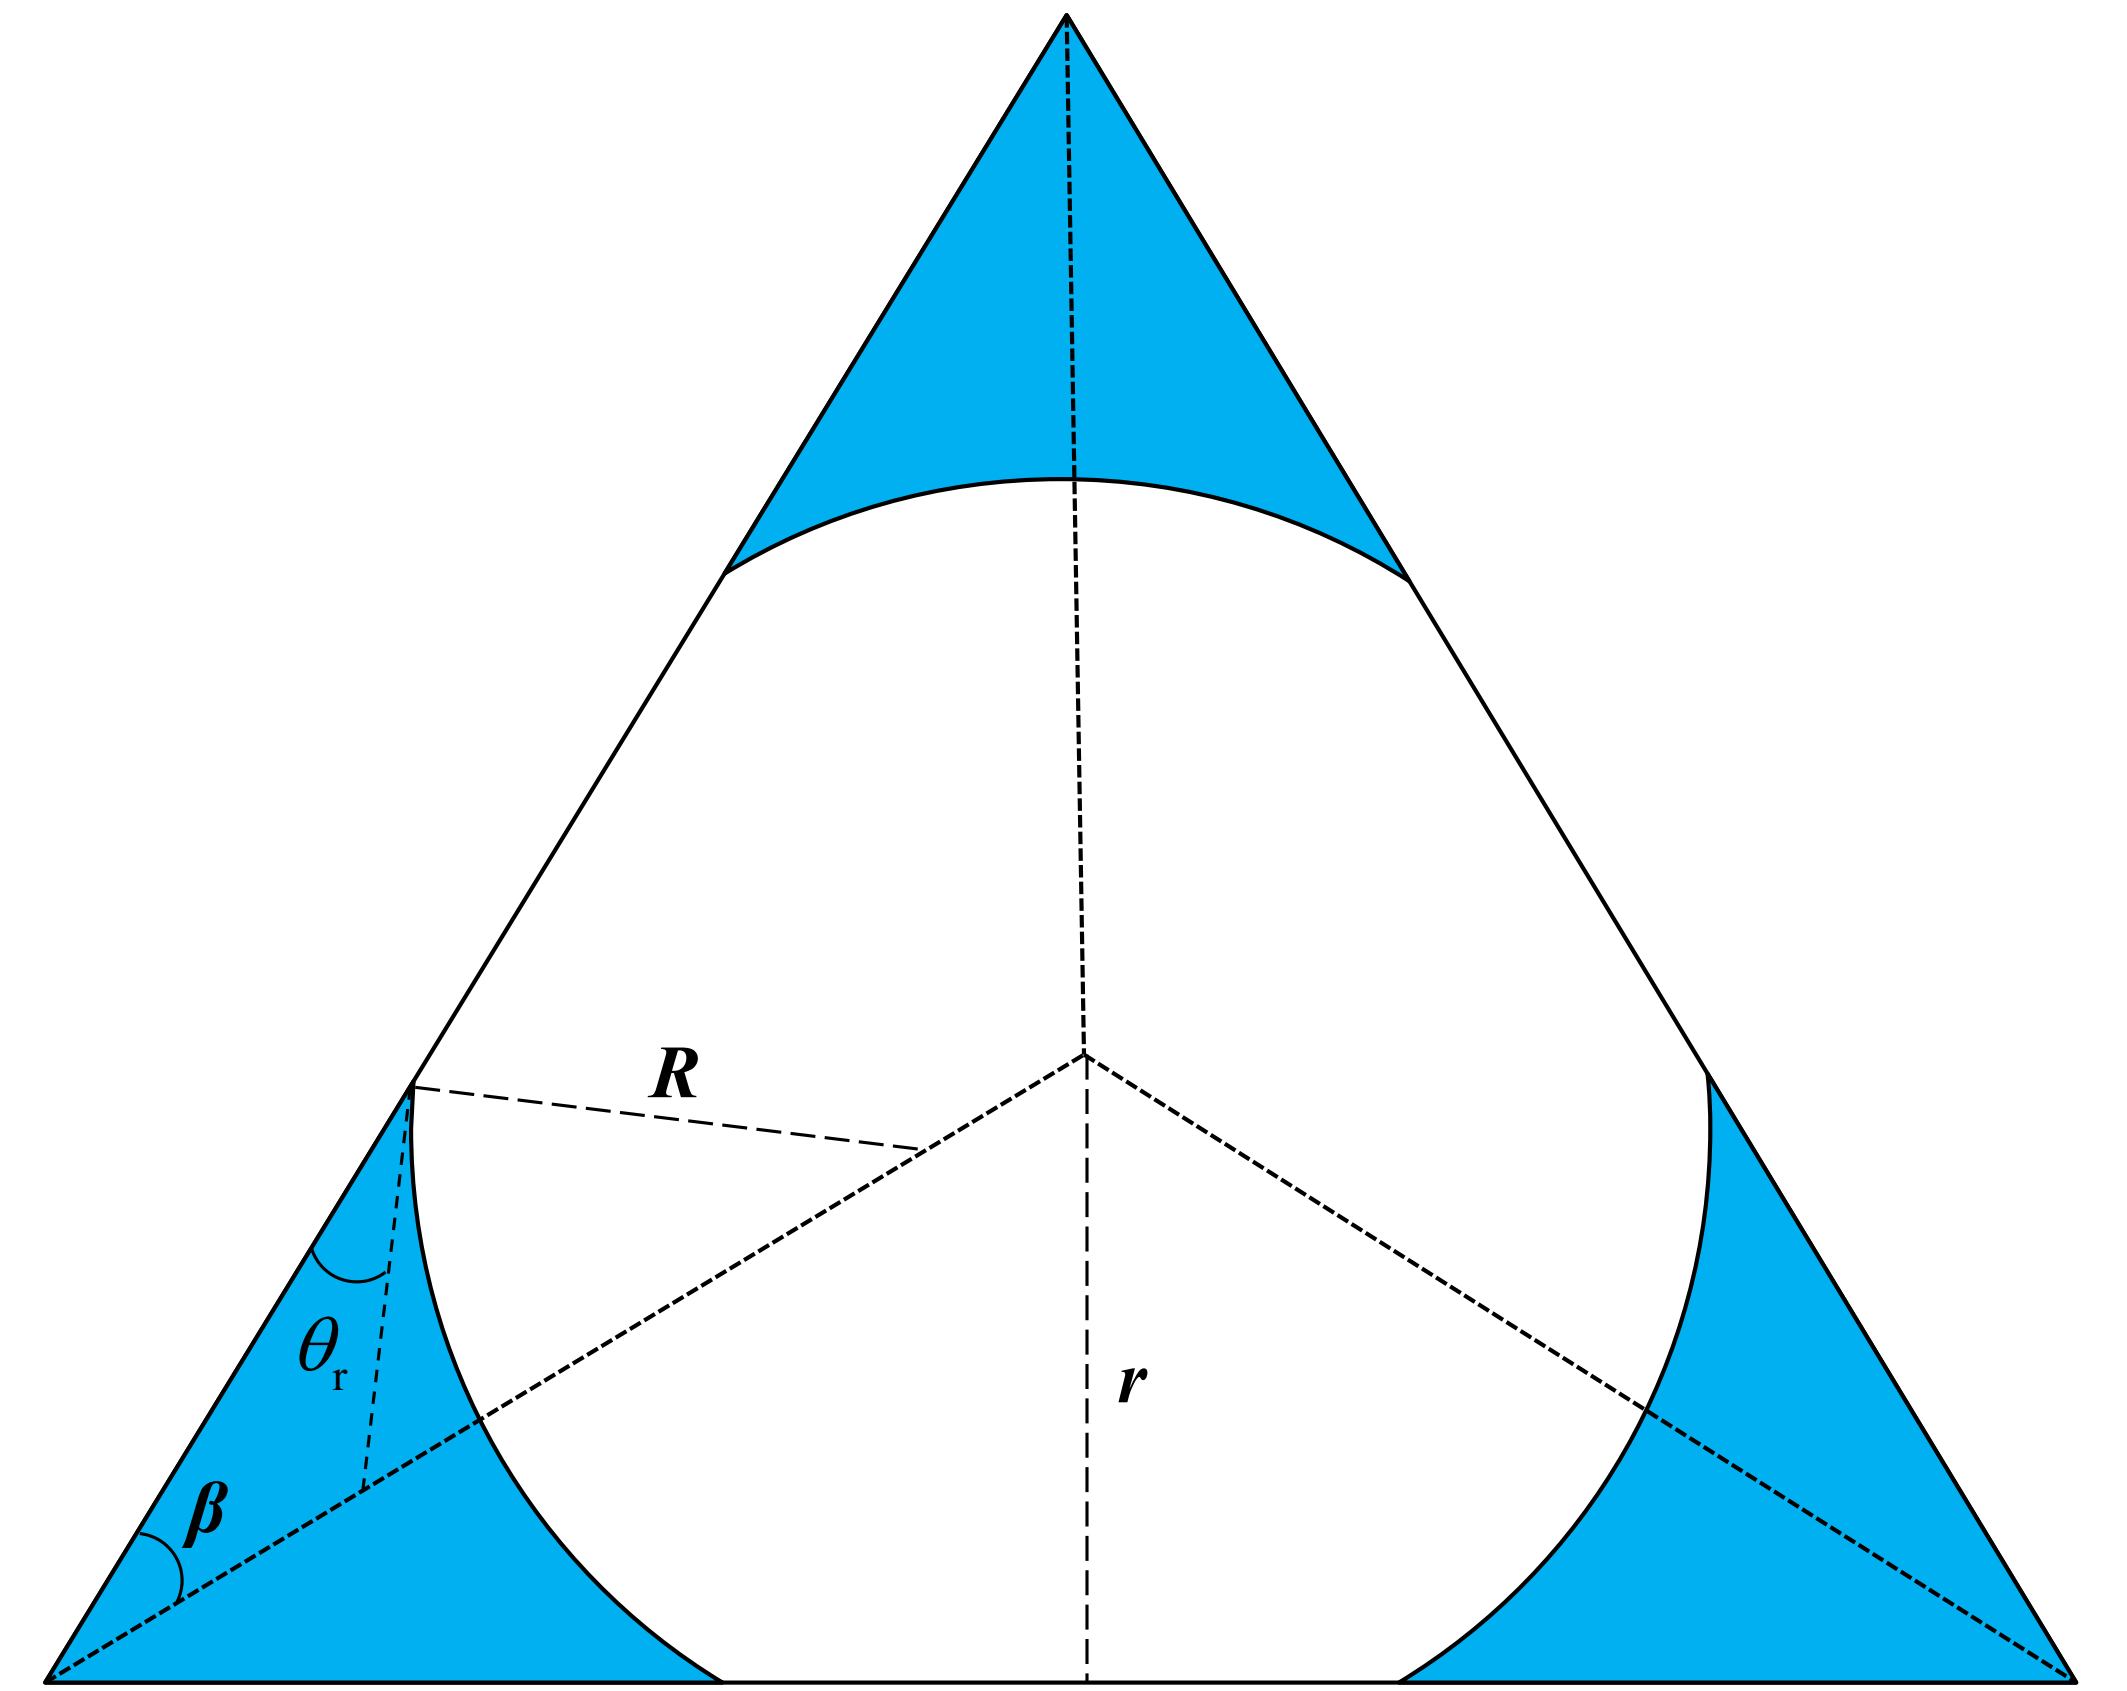


**Figure S2.** The fluid distribution in a throat with cross-sectional shape of triangle.

During the gas-water displacement process, water saturation in the network model at a certain step is given by:

where, *S*w is water saturation; *V*iw is the volume occupied by water in pore (or throat) i; *V*i is the volume of pore (or throat) i; n is the number of pores and throats in the pore network model.

In pore network simulation, the relative permeability of water or gas phase could be expressed as Equation :

where, *kri* is the relative permeability of phase *i*; *qtmi* is the total flow rate of phase *i* for multiphase flow; *qtsi* is the total flow rate when the network model is saturated by single phase *i*. The total flow rate of network model is obtained by summing the flow rate of each pore at inlet face. The conversation principle is applied for each pore element to get a linear equation system (Equation ), which is solved to obtain the pressures of pores and flow rates of throats.

where, *k* is the index of pores connected to pore *j*; *qi,jk* is the flow rate of phase *i* from pore *j* to pore *k*, which could be calculated as Equation :

where, *gi,jk* is the hydraulic conductance of phase *i* between pore *j* and pore *k*; *pi,j* and *pi,k* are pressures of phase *i* in pore *j* and pore *k*; *Ljk* is the distance between center of pore *j* and pore *k*; *Lj* and *Lk* are lengths of half-pore *j* and half-pore *k*; *L*t is length of the throat connecting pore *j* and pore *k*; *gi*,t is the hydraulic conductance of the throat connecting pore *j* and pore *k*; *gi,j* and *gi,k* are hydraulic conductance of half-pore *j* and half-pore *k* (as illustrated in **Figure S3**).


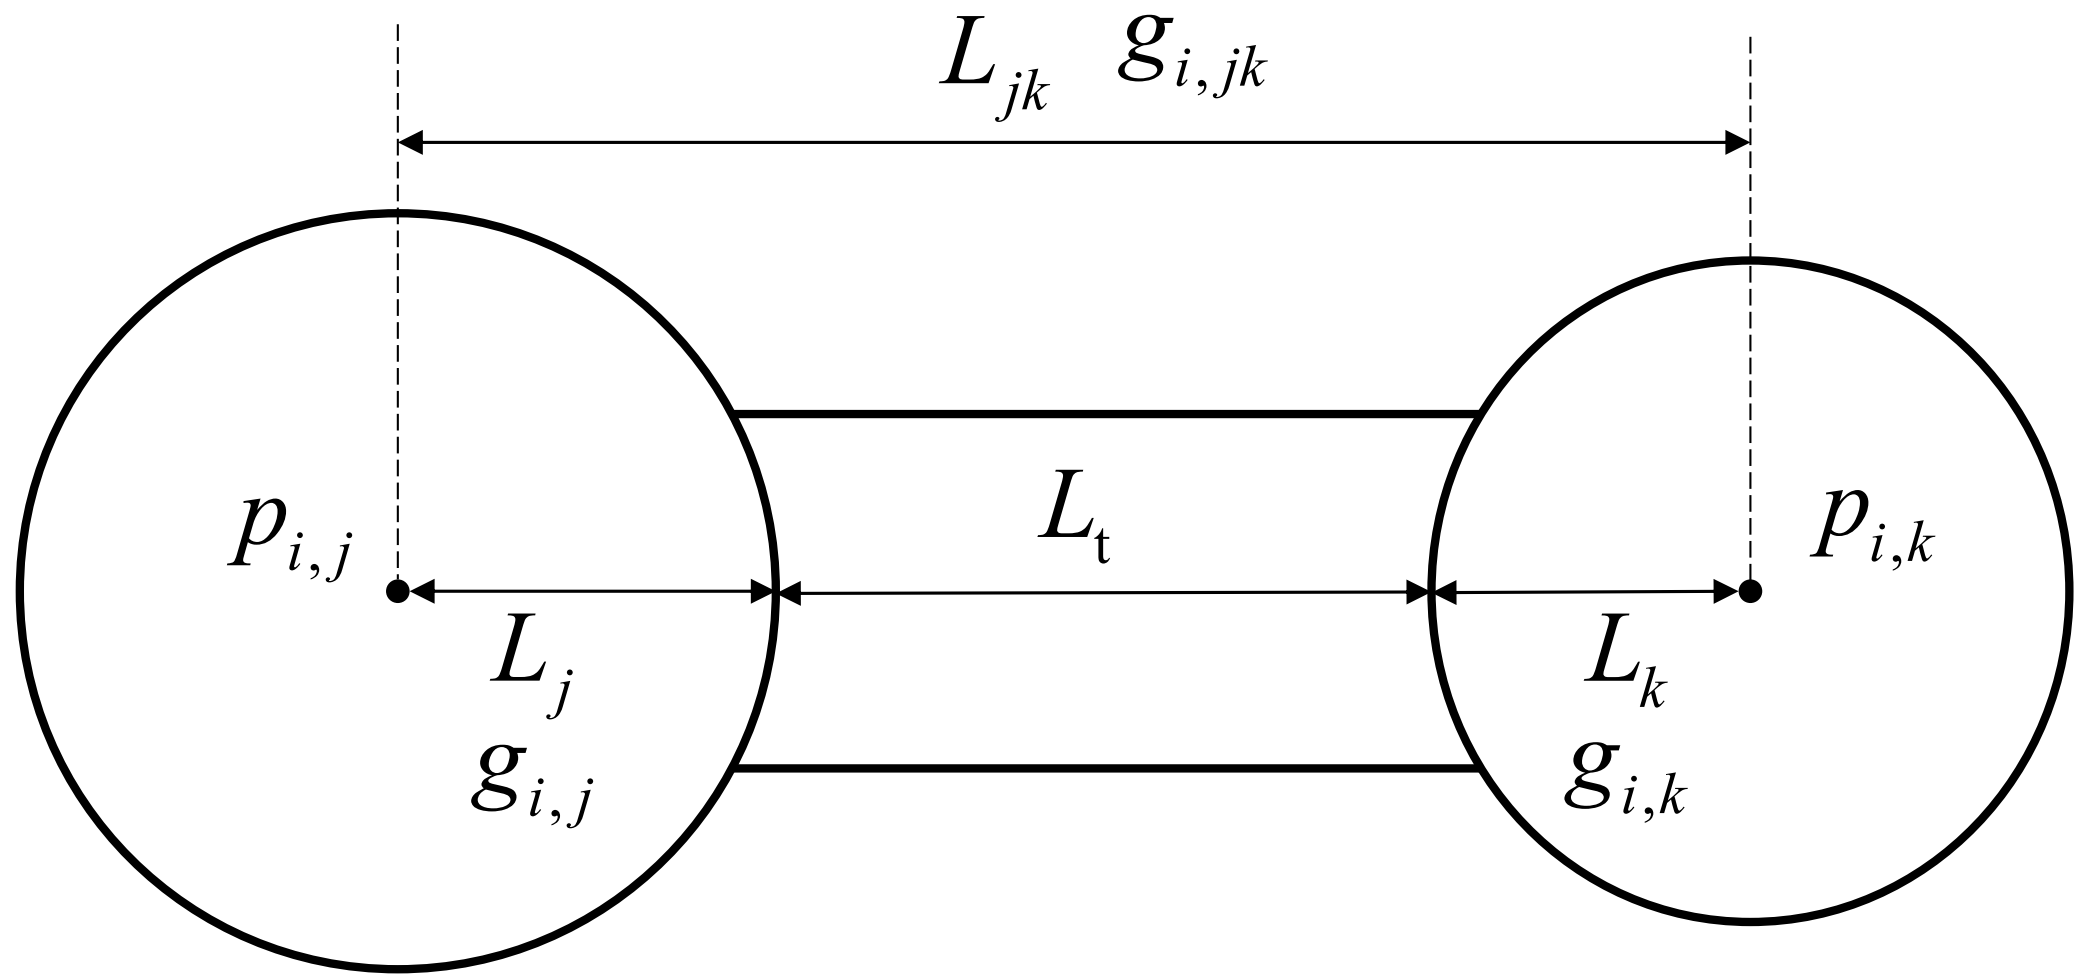


**Figure S3.** The hydraulic conductance of phase *i* between pore *j* and pore *k*.

**Reference**

Blunt MJ (2001) Flow in porous media — pore-network models and multiphase flow. Current Opinion in Colloid & Interface Science, 6,197-207.

Blunt MJ, Jackson MD, Piri M & Valvatne PH (2002) Detailed physics, predictive capabilities and macroscopic consequences for pore-network models of multiphase flow. Advances in Water Resources, 25,1069-1089.
